# Supplementary material for: Antifungal Properties of Biogenic Selenium Nanoparticles Functionalized with Nystatin for the Inhibition of Candida albicans Biofilm Formation
Source: MDPI journal article supplement (doi:10.3390/molecules28041836), 2023-02-15
Supplement: s1 [file s1]

## Supplementary materials

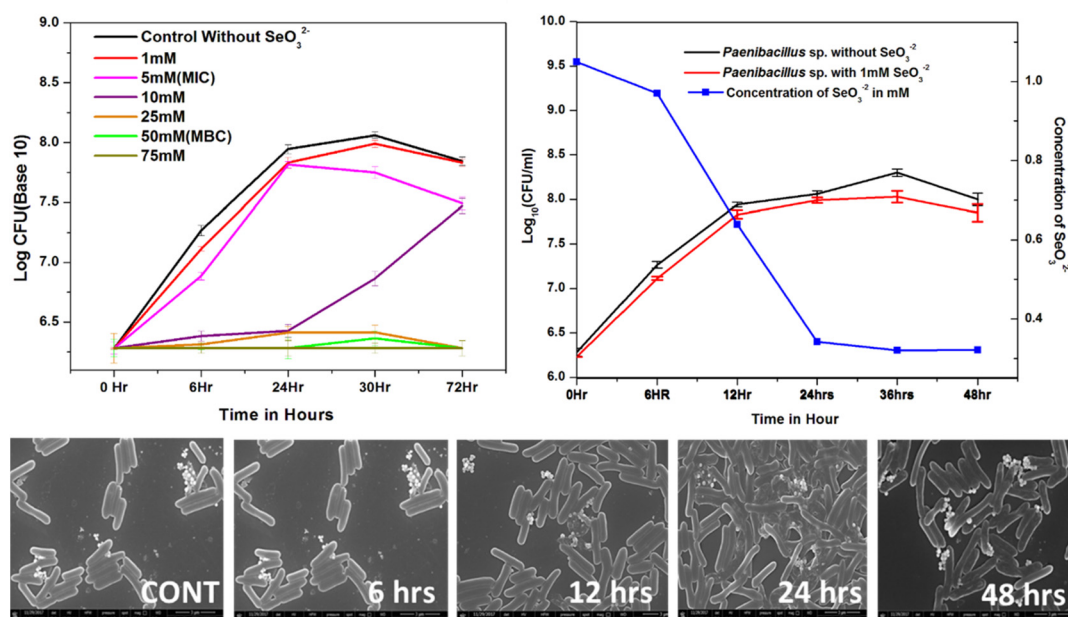

**Figure S1.** The growth kinetics of *P. terreus* in different concentration of sodium selenite shown in log cfu (left). Growth of *P. terreus* in presence of 1mM sodium selenite and corresponding decrease in the concentration of selenium ions after synthesizing SeNPs (Z-axis). Lower panel indicate the FESEM micrographs showing the size of SeNPs and cells during the synthesis biogenic SeNPs.

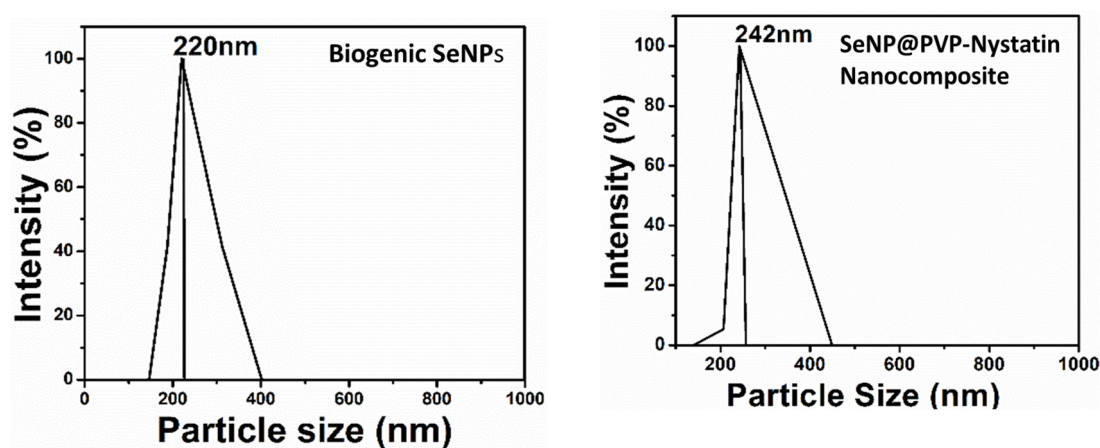

**Figure S2.** DLS analysis of Biogenic SeNPs (left) and SeNP@PVP-Nystatin nanoconjugates (right) showing the particle size distribution of biogenic SeNPs and nanoconjugates. The average particle size of biogenic SeNPs and nanoconjugates was respectively, 220 nm and 242 nm.

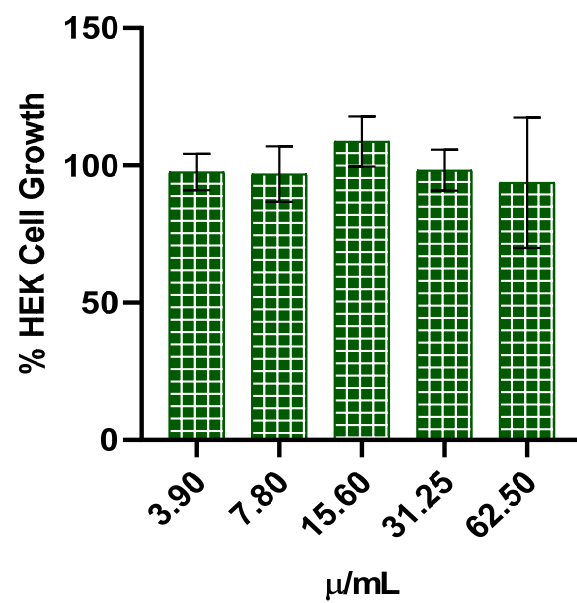

**Figure S3.** Cytotoxicity study of SeNP@PVP-Nystatin nanoconjugates on HEK-293 cell line.
